# Supplementary material
Source: PubMed Central journal article supplement (PMC8090521)
Supplement: 41390_2021_1547_MOESM1_ESM.pdf [file 41390_2021_1547_MOESM1_ESM.pdf]

Supplemental table: description of patients with neurological presentation. Years old (yo); months old (mo); Computed tomography (CT); Magnetic resonance imaging (MRI); Acute disseminated encephalomyelitis (ADEM); Loss of consciousness (LOC); Cerebrospinal fluid (CSF); glucose (Glu) mg/d; protein (Pr) mg/dl; white blood cells (WBC) cells/mm<sup>3</sup>; red blood cells (RBC) cells/mm<sup>3</sup>; mononuclear (MN) cells; acid-fast bacillus (AFB)

|         | AGE   | DIAGNOSIS                                                                                            | PRESENTATION                                                               | OUTCOME    | BRAIN IMAGING                                                                                                                                   | CSF                                                              |
|---------|-------|------------------------------------------------------------------------------------------------------|----------------------------------------------------------------------------|------------|-------------------------------------------------------------------------------------------------------------------------------------------------|------------------------------------------------------------------|
| CASE 1  | 2 yo  | Encephalitis<br>Cerebral edema                                                                       | Seizures<br>Fever<br>Lethargy                                              | Discharged | CT: No lesions, diffuse brain edema, no midline shift                                                                                           | Glu 68<br>Pr 19<br>WBC 0                                         |
| CASE 2  | 13 yo | Hemorrhagic stroke<br>Cerebral edema<br>Meningoencephalitis<br>Brain herniation                      | Headache<br>Ataxia<br>Fever<br>Left hemiparesis                            | Died       | CT: Diffuse brain edema, hypodense cortical and sub-cortical right lesion, r/o blood, interhemispheric and tentorial area meningeal enhancement | Glu 81<br>Pr 45<br>WBC 6<br>(MN 80%)                             |
| CASE 3  | 5 yo  | Hemorrhagic stroke<br>Brain herniation                                                               | LOC<br>Seizure<br>Vomit                                                    | Died       | CT: Basal ganglia hematoma, right ventricle hemorrhage, midline leftward shift, brain edema, brain herniation                                   | -                                                                |
| CASE 4  | 16 yo | Meningitis<br>Pulmonary Tuberculosis                                                                 | Lethargy<br>Fever<br>Headache<br>Hypertonic                                | Died       | CT: Diffuse brain edema, subcortical hypodensities                                                                                              | Glu 24<br>Pr 205<br>WBC 24<br>(MN 80%)<br>RBC 60<br>AFB positive |
| CASE 5  | 2 mo  | Encephalitis                                                                                         | Fever<br>Lethargy<br>Hypotonic                                             | Discharged | CT: Loss of white – gray matter differentiation, no lesions, no midline shift                                                                   | Elevated opening pressure<br>Glu 59<br>Pr 41<br>WBC 0            |
| CASE 6  | 1 mo  | Encephalitis<br>Subarachnoid hemorrhage                                                              | Lethargy<br>Vomit<br>Seizures                                              | Discharged | CT: Hypoxic ischemic changes, occipital subarachnoid hemorrhage                                                                                 |                                                                  |
| CASE 7  | 1 yo  | Hemorrhagic stroke<br>Leukemia<br>Pulmonary hemorrhage                                               | Fever<br>Lethargy                                                          | Died       | CT: Hemorrhagic lesion in right frontotemporal region, midline shift, brain herniation                                                          |                                                                  |
| CASE 8  | 13 yo | ADEM                                                                                                 | Headache<br>Vomit<br>Lethargy<br>Lower extremities weakness                | Discharged | MRI: Multifocal hyperintense white matter lesions in frontotemporal region                                                                      | Glu 52<br>Pr 43<br>WBC 40<br>(MN 85%)<br>COVID-19 negative       |
| CASE 9  | 13 yo | Ischemic stroke                                                                                      | Fever<br>Right spastic hemiparesis                                         | Discharged | CT: Ischemic lesion in left basal ganglia. Diffuse cortico-subcortical atrophy                                                                  |                                                                  |
| CASE 10 | 1 yo  | Encephalitis<br>Respiratory failure                                                                  | Status epilepticus                                                         | Discharged | CT: Diffuse edema, parietal laminar subdural hematoma                                                                                           | Glu 116<br>Pr 39<br>WBC 3<br>(MN 100%)                           |
| CASE 11 | 7 yo  | Hemorrhagic stroke<br>Shock / cardiac arrest<br>P-ARDS<br>Atypical Kawasaki<br>MIS-C<br>Pericarditis | Vomit<br>Abdominal pain<br>Respiratory distress<br>Edematous hands<br>Rash | Died       | CT: intraventricular hemorrhage left lateral and posterior with acute hydrocephalus                                                             |                                                                  |
